# Supplementary material for: Does Atrial Septal Anatomy Still Matter in the Etiological Evaluation of Ischemic Stroke Beyond the Age of 60?
Source: PubMed Central journal article supplement — J Am Heart Assoc. 2024 Feb 14;13(4):e031684. doi: 10.1161/JAHA.123.031684 (PMC11010114; doi:10.1161/jaha.123.031684), 2024-02-14

# Supplemental Material

## Data S1. Supplemental Results

We performed a post-hoc subgroup analysis dividing the patients into two age groups: 60-69 years and 70-80 years. The main results are shown below:

Proportion of patients with PFO among those with cryptogenic vs. non-cryptogenic strokes (P for interaction=0.28):

Age 60 to 69: 61/128 (47.7%) vs. 31/186 (16.7%), OR 4.55 (95%CI 2.71-7.65), P<0.0001

Age 70 to 80: 36/90 (40.0%) vs. 24/129 (18.6%), OR 2.92 (95%CI 1.58-5.38), P=0.0005

Proportion of patients with large PFO + ASA among those with cryptogenic vs. non-cryptogenic strokes:

Age 60 to 69: 21/61 (34.4%) vs. 4/31 (12.9%)

Age 70 to 80: 16/36 (44.4%) vs. 4/24 (16.7%)

Considering non-large PFO without ASA as reference, the OR for the association between large PFO + ASA and cryptogenic stroke was:

- OR 4.63 (95%CI 1.30-16.58) for patients aged 60 to 69
- OR 3.56 (95%CI 0.83-15.18) for patients aged 70 to 80
- P for interaction=0.85

**Table S1. Subgroup of patients with PFO: factors associated with cryptogenic or non-cryptogenic stroke.**

| Variable                                                           | All (n=152)    | Cryptogenic stroke (n=97) | Non-cryptogenic stroke (n=55) | P       |
|--------------------------------------------------------------------|----------------|---------------------------|-------------------------------|---------|
| <b>Age (years) mean (SD)</b>                                       | 68.4 (5.1)     | 68.0 (5.1)                | 69.1 (5.3)                    | 0.21    |
| <b>Male sex</b>                                                    | 98 (64.5%)     | 63 (64.9%)                | 35 (63.6%)                    | 0.87    |
| <b>Hypertension</b>                                                | 74 (48.7%)     | 41 (42.3%)                | 33 (60.0%)                    | 0.04    |
| <b>Diabetes mellitus</b>                                           | 20 (13.2%)     | 9 (9.3%)                  | 11 (20.0%)                    | 0.06    |
| <b>Current smoking</b>                                             | 27 (17.8%)     | 17 (17.5%)                | 10 (18.2%)                    | 0.92    |
| <b>Lipid lowering medication</b>                                   | 63 (41.4%)     | 39 (40.2%)                | 24 (43.6%)                    | 0.68    |
| <b>Antiplatelet medication</b>                                     | 52 (34.2%)     | 28 (28.9%)                | 24 (43.6%)                    | 0.07    |
| <b>Vitamin K Antagonists</b>                                       | 1 (0.7%)       | 1 (1.0%)                  |                               | 0.45    |
| <b>DOAC or other anticoagulant</b>                                 | 5 (3.3%)       | 2 (2.1%)                  | 3 (5.5%)                      | 0.27    |
| <b>Previous ischemic stroke</b>                                    | 22 (14.5%)     | 14 (14.4%)                | 8 (14.5%)                     | 0.98    |
| <b>Previous TIA</b>                                                | 18 (11.8%)     | 11 (11.3%)                | 7 (12.7%)                     | 0.8     |
| <b>Previous CHD</b>                                                | 16 (10.5%)     | 7 (7.2%)                  | 9 (16.4%)                     | 0.08    |
| <b>Atrial fibrillation</b>                                         | 5 (3.3%)       | 1 (1.0%)                  | 4 (7.3%)                      | 0.04    |
| <b>Previous DVT or PE</b>                                          | 7 (4.6%)       | 5 (5.2%)                  | 2 (3.6%)                      | 0.67    |
| <b>Previous cancer</b>                                             | 25 (16.4%)     | 14 (14.4%)                | 11 (20.0%)                    | 0.37    |
| <b>NIHSS on admission median (IQR)</b>                             | 1.0 (0.0, 3.0) | 1.0 (0.0, 3.0)            | 1.0 (0.0, 2.0)                | 0.97    |
| <b>MRI performed</b>                                               | 148 (97.4%)    | 94 (96.9%)                | 54 (98.2%)                    | 0.64    |
| <b>CEMRA performed</b>                                             | 134 (88.2%)    | 86 (88.7%)                | 48 (87.3%)                    | 0.8     |
| <b>CTA performed</b>                                               | 45 (29.6%)     | 25 (25.8%)                | 20 (36.4%)                    | 0.18    |
| <b>Ultrasound performed</b>                                        | 53 (34.9%)     | 27 (27.8%)                | 26 (47.3%)                    | 0.02    |
| <b>24-hr ECG monitoring</b>                                        | 31 (20.4%)     | 15 (15.5%)                | 16 (29.1%)                    | 0.045   |
| <b>Prolonged ECG Monitoring</b>                                    | 110 (72.4%)    | 79 (81.4%)                | 31 (56.4%)                    | <0.0001 |
| <b>Anticoagulation at discharge</b>                                | 27 (17.8%)     | 19 (19.6%)                | 8 (14.5%)                     | 0.43    |
| <b>Time between event and echocardiography (days) median (IQR)</b> | 4.0 (3.0, 7.0) | 4.0 (3.0, 6.0)            | 5.0 (3.0, 7.0)                | 0.2     |
| <b>Dilated LA</b>                                                  | 55 (36.2%)     | 30 (30.9%)                | 25 (45.5%)                    | 0.07    |
| <b>PFO characteristics</b>                                         |                |                           |                               | 0.02    |
| <b>large PFO with ASA</b>                                          | 45 (29.6%)     | 37 (38.1%)                | 8 (14.5%)                     |         |
| <b>large PFO without ASA</b>                                       | 38 (25.0%)     | 23 (23.7%)                | 15 (27.3%)                    |         |
| <b>non-large PFO with ASA</b>                                      | 20 (13.2%)     | 11 (11.3%)                | 9 (16.4%)                     |         |
| <b>non-large PFO without ASA</b>                                   | 49 (32.2%)     | 26 (26.8%)                | 23 (41.8%)                    |         |

DOAC: direct oral anticoagulant; TIA: transient ischemic attack; CHD: coronary heart disease; DVT: deep vein thrombosis; PE: pulmonary embolism; NIHSS: National Institute of Health Stroke Scale; MRI: magnetic-resonance imaging; CEMRA: Contrast-enhanced magnetic resonance angiography; CTA: computed tomography angiography; ECG: electrocardiogram; LA: left atrium; PFO: patent foramen ovale; ASA: atrial septum aneurysm.

**Table S2. From the ASCOD Classification: Detailed Causality Grades for Cardiac Pathology**

|                                                                                                                                                                                                                                                                               |
|-------------------------------------------------------------------------------------------------------------------------------------------------------------------------------------------------------------------------------------------------------------------------------|
| <b>C1 (potentially causal):</b> Cardiogenic stroke defined as acute, or recent and older bihemispheric or supra- and infratentorial territorial or cortical ischemic lesions and signs of systemic embolism with detection of at least one of the following potential causes: |
| (1) mitral stenosis (surface <1.5 cm <sup>2</sup> )                                                                                                                                                                                                                           |
| (2) mechanical valve                                                                                                                                                                                                                                                          |
| (3) myocardial infarction within 4 weeks preceding the cerebral infarction                                                                                                                                                                                                    |
| (4) mural thrombus in the left cavities                                                                                                                                                                                                                                       |
| (5) aneurysm of the left ventricle                                                                                                                                                                                                                                            |
| (6) history or presence of documented atrial fibrillation – whether paroxysmal (>60 s), persistent or permanent – or flutter, with or without left atrial thrombus or spontaneous echo                                                                                        |
| (7) atrial disease (tachycardia-bradycardia syndrome)                                                                                                                                                                                                                         |
| (8) dilated or hypertrophic cardiomyopathies                                                                                                                                                                                                                                  |
| (9) left ventricle ejection fraction <35%                                                                                                                                                                                                                                     |
| (10) endocarditis                                                                                                                                                                                                                                                             |
| (11) intracardiac mass                                                                                                                                                                                                                                                        |
| <b>(12) PFO and thrombus in situ</b>                                                                                                                                                                                                                                          |
| <b>(13) PFO and concomitant pulmonary embolism or proximal DVT preceding the index cerebral infarction</b>                                                                                                                                                                    |
| (14) aforementioned cardiac pathologies (C1) with single or without obvious cerebral ischemic lesion                                                                                                                                                                          |
| <b>C2 (causal link is uncertain):</b> Regardless of stroke pattern:                                                                                                                                                                                                           |
| <b>(1) PFO + atrial septal aneurysm</b>                                                                                                                                                                                                                                       |
| <b>(2) PFO and pulmonary embolism or proximal DTV concomitant but NOT preceding the index cerebral infarction</b>                                                                                                                                                             |
| (3) intracardiac spontaneous echo-contrast                                                                                                                                                                                                                                    |
| (4) apical akinesia of the left ventricle and decreased ejection fraction (but >35%)                                                                                                                                                                                          |
| (5) history of myocardial infarction or palpitation and multiple brain infarction, repeated either bilateral or in two different arterial territories (e.g. both anterior and posterior circulation)                                                                          |

(6) no direct cardiac source identified, but multiple brain infarction, repeated either bilateral or in two different arterial territories (e.g. both anterior and posterior circulation) and/or evidence of systemic emboli: renal or splenic or mesenteric infarction (on CT, MRI or autopsy) or embolism in peripheral artery supplying arm or leg

**C3 (causal link is unlikely, but the disease is present)** One of the following abnormalities present in isolation: PFO, ASA, strands, mitral annulus calcification, calcification aortic valve, nonapical akinesia of the left ventricle, transient atrial fibrillation <60 s, atrial hyperexcitability

**C0 (cardiac pathology not detected or not suspected)** Ruling out a cardiac source of embolism: minimum is negative ECG and examination by a cardiologist; maximum is negative ECG/telemetry/24-hour Holter ECG/long-term ECG recording (implantable device, transtelephonic ECG, loop recorder) and negative TEE for atrium, valves and septal abnormalities, negative TTE for PFO and assessment of left ventricle, negative cardiac CT/MRI, negative abdominal CT/MRI (search for old or simultaneous subdiaphragmatic visceral infarction)

**C9 (incomplete workup)** Minimum is ECG and examination by a trained cardiologist in the absence of cardiac imaging

Figure S1. Flow Chart

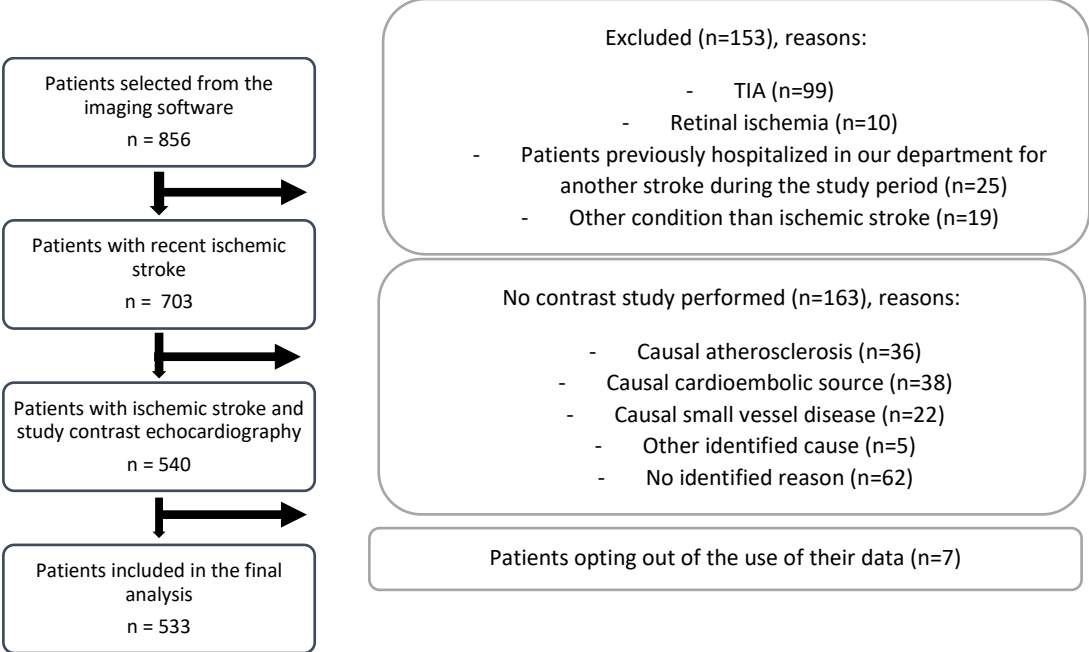

Supplement: JAH3-13-e031684-s001.pdf [file JAH3-13-e031684-s001.pdf]
